# Supplementary material
Source: PubMed Central journal article supplement (PMC4732907)
Supplement: NIHMS739627-supplement-Supplemental_Material.pdf [file NIHMS739627-supplement-Supplemental_Material.pdf]

## SUPPLEMENTAL DATA

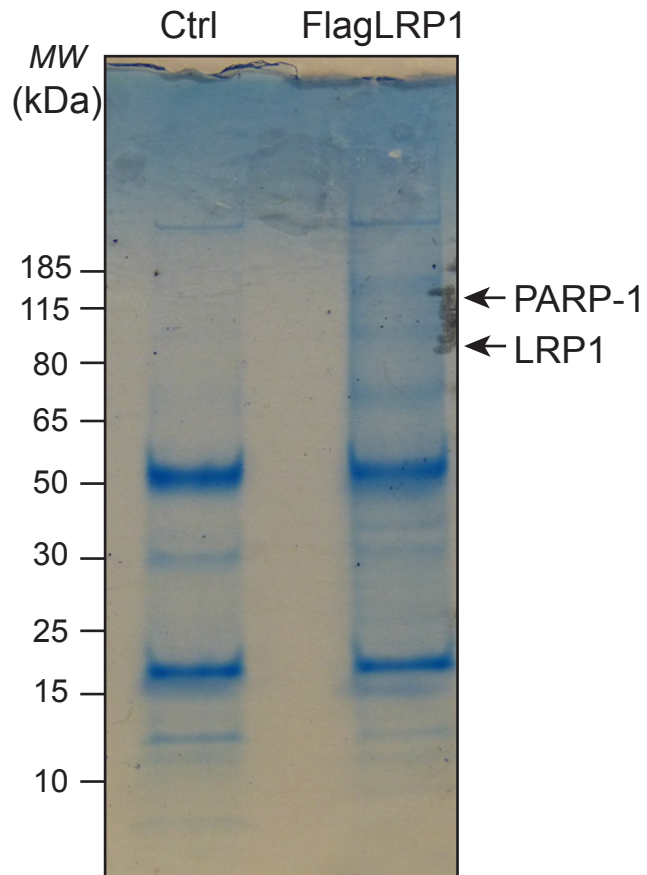

**Figure SI. PARP-1 is a candidate protein associating with LRP1.** Lysates of HEK 293 cells with stably transfected Flag-tagged LRP1  $\beta$  chain (Flag-LRP1) were immunoprecipitated with an anti-Flag antibody and stained with Coomassie blue. The positive bands were subjected to mass spectrometry analysis to identify interacting proteins. PARP-1 is one of these candidate proteins that are likely associated with LRP1.

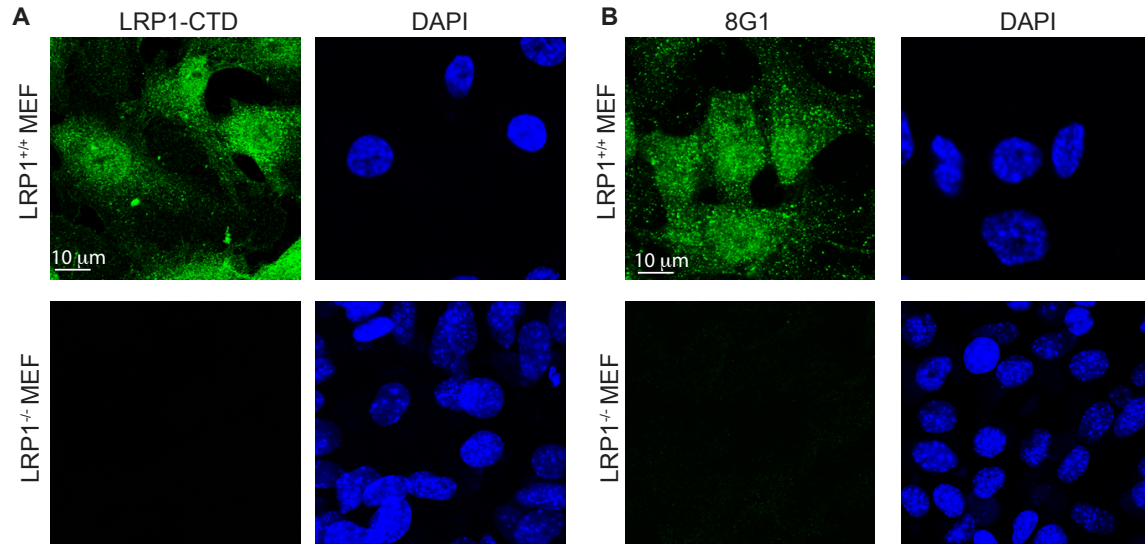

**Figure SII. LRP1 antibodies are specific for LRP1 staining.** LRP1<sup>+/+</sup> MEF and LRP1<sup>-/-</sup> MEF cells were stained with LRP1 (C-terminal) antibody (LRP1-CTD, Cat. No. L2170 from Sigma, in A) or 8G1 antibody (Cat. No. ab20384 from Abcam, in B), and DAPI for nucleus. In LRP1<sup>+/+</sup> MEFs, we observed LRP1 specific signals with some in vesicle-like structures. However, no detectable signals of LRP1 were observed with LRP1<sup>-/-</sup> MEF cells.

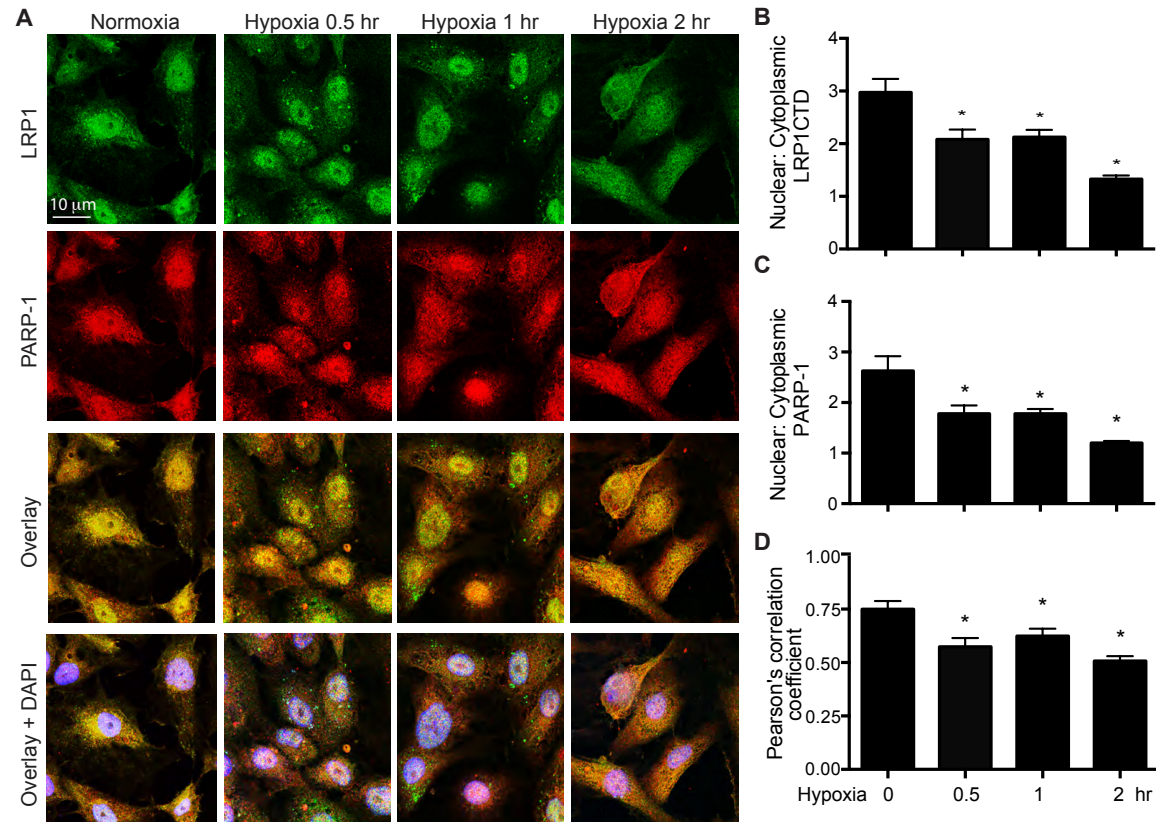

**Figure SIII. Hypoxia affects the subcellular localization of LRP1 and PARP-1 and decreases their association.** **A**, HREC cells were cultured with or without pretreatment of DAPT at 10  $\mu$ M for 24 hours under normoxia condition, or exposed to hypoxia at 2% O<sub>2</sub> for the indicated time. After fixation, cells were stained with LRP1 (C-terminal) antibody (LRP1-CTD, Cat. No. L2170 from Sigma), PARP-1 antibody and DAPI for nucleus. **B-C**, The subcellular localization of LRP1 (B) and PARP-1 (C) is presented as a ratio of relative signals of LRP1 C-terminal or PARP-1 protein in the nucleus to that in the cytoplasm. **D**, The co-localization of LRP1 and PARP-1 was presented with Pearson's correlation coefficients. \*,  $P < 0.05$ , compared to cells cultured in normoxia, analyzed with one-way ANOVA followed by Bonferroni comparison test.  $n \geq 7$ .

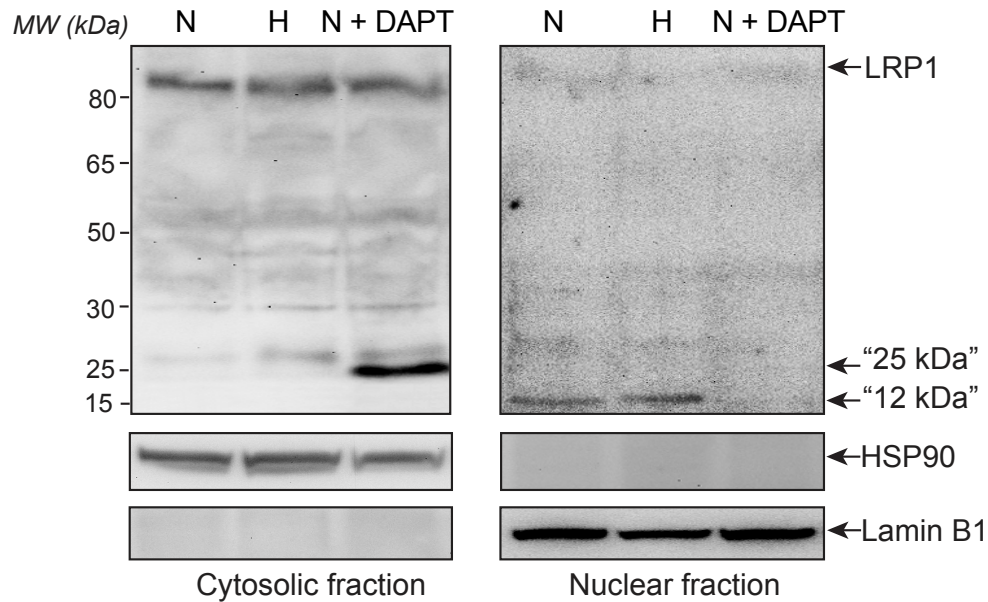

**Figure SIV. The  $\gamma$ -secretase-dependent LRP1 processing is not affected by hypoxia.** HREC cells were pretreated with DAPT (10  $\mu$ M) for 24 hours and then cultured under normoxia (N) or hypoxia (H, 2% O<sub>2</sub>) level for 2 hours. Cells were then harvested and separated into the indicated subcellular fractions. Western blotting with LRP1 (C-terminal) antibody (Cat. No. L2170 from Sigma) and markers for cytosolic fractions (Hsp90) and nuclear fractions (Lamin B1) was performed as indicated.

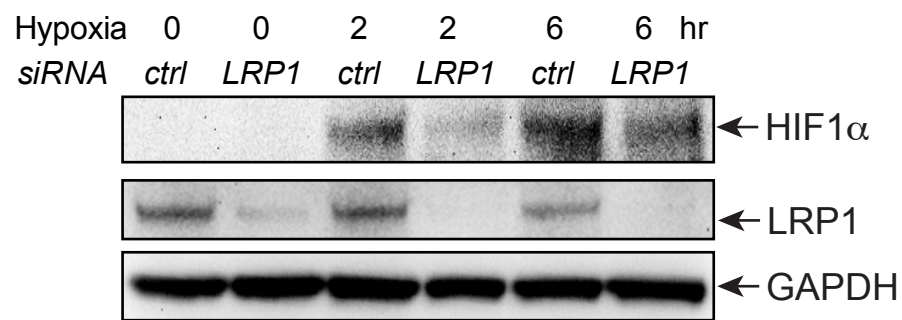

**Figure SV. HIF1a induction is inhibited by LRP1 knockdown in HRECs.**  
HRECs were exposed to 2% O<sub>2</sub> for different time periods, followed by Western blotting analysis for the detection of HIF1α protein.

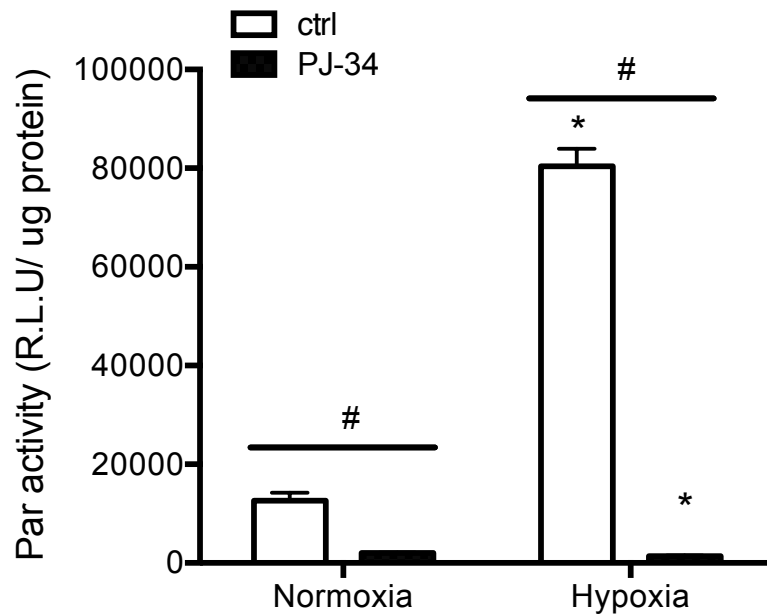

**Figure SVI. PARP-1 activity is inhibited by its inhibitor PJ-34 in HRECs.** Quantitative data were presented as a ratio of relative light unit (R.L.U.) to total protein amount in cell lysates. \*,  $P < 0.05$ , compared to same cells under normoxia. #,  $P < 0.05$ , compared to control siRNA-transfected HRECs.  $n = 3$ . Data was analyzed by two-way ANOVA followed by Fisher's LSD multiple comparison test.

Table SI. Proteins identified in LRP1-associated protein complexes by mass spectrometry.

| Sample | Name                                                     | Accession    | Species      | Peptide Count <sup>1</sup> | %Coverage | Total score <sup>2</sup> |
|--------|----------------------------------------------------------|--------------|--------------|----------------------------|-----------|--------------------------|
| 1      | low density lipoprotein-related protein 1 variant        | gi 62088576  | Homo sapiens | 10                         | 3.518     | 12.7                     |
| 2      | poly(ADP-ribose) synthetase                              | gi 337424    | Homo sapiens | 30                         | 26.23     | 38.92                    |
| 3      | heat shock protein HSP 90-alpha isoform 2                | gi 154146191 | Homo sapiens | 20                         | 35.52     | 29.01                    |
| 4      | topoisomerase I                                          | gi 339806    | Homo sapiens | 14                         | 22.88     | 20.13                    |
| 5      | DNA replication licensing factor MCM4                    | gi 33469917  | Homo sapiens | 9                          | 22.94     | 16.68                    |
| 6      | LDL-receptor related precursor (AA -19 to 4525)          | gi 34339     | Homo sapiens | 18                         | 4.842     | 16.58                    |
| 7      | translational control protein 80                         | gi 5006602   | Homo sapiens | 14                         | 20.16     | 13.45                    |
| 8      | HIST1H4F                                                 | gi 49457374  | Homo sapiens | 11                         | 60.19     | 12.55                    |
| 9      | RNA binding protein                                      | gi 5821153   | Homo sapiens | 41                         | 12.28     | 51.25                    |
| 10     | DNA-dependent protein kinase catalytic subunit isoform 1 | gi 13654237  | Homo sapiens | 12                         | 3.852     | 23.27                    |

Notes:

1= Number of peptides matched to the protein sequence (95% confidence)

2= Score of the quality of MS/MS peptide fragment ion matches
